# Supplementary material
Source: publisher site journal article supplement (https://www.dovepress.com/article/444408)
Supplement: Supplementary file 1 [file get_supplementary_file.php]

## Supplementary Figure S1

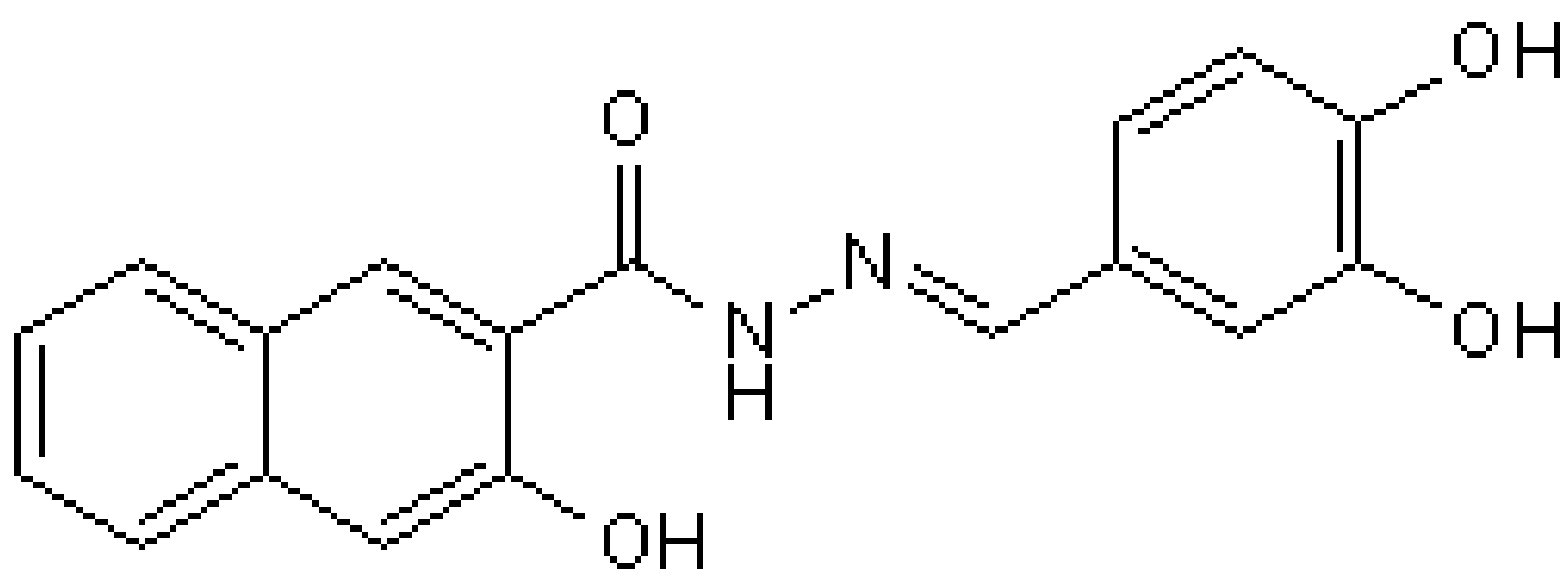

Figure S1. The molecular structure of dynasore.

## Supplementary Figure S2

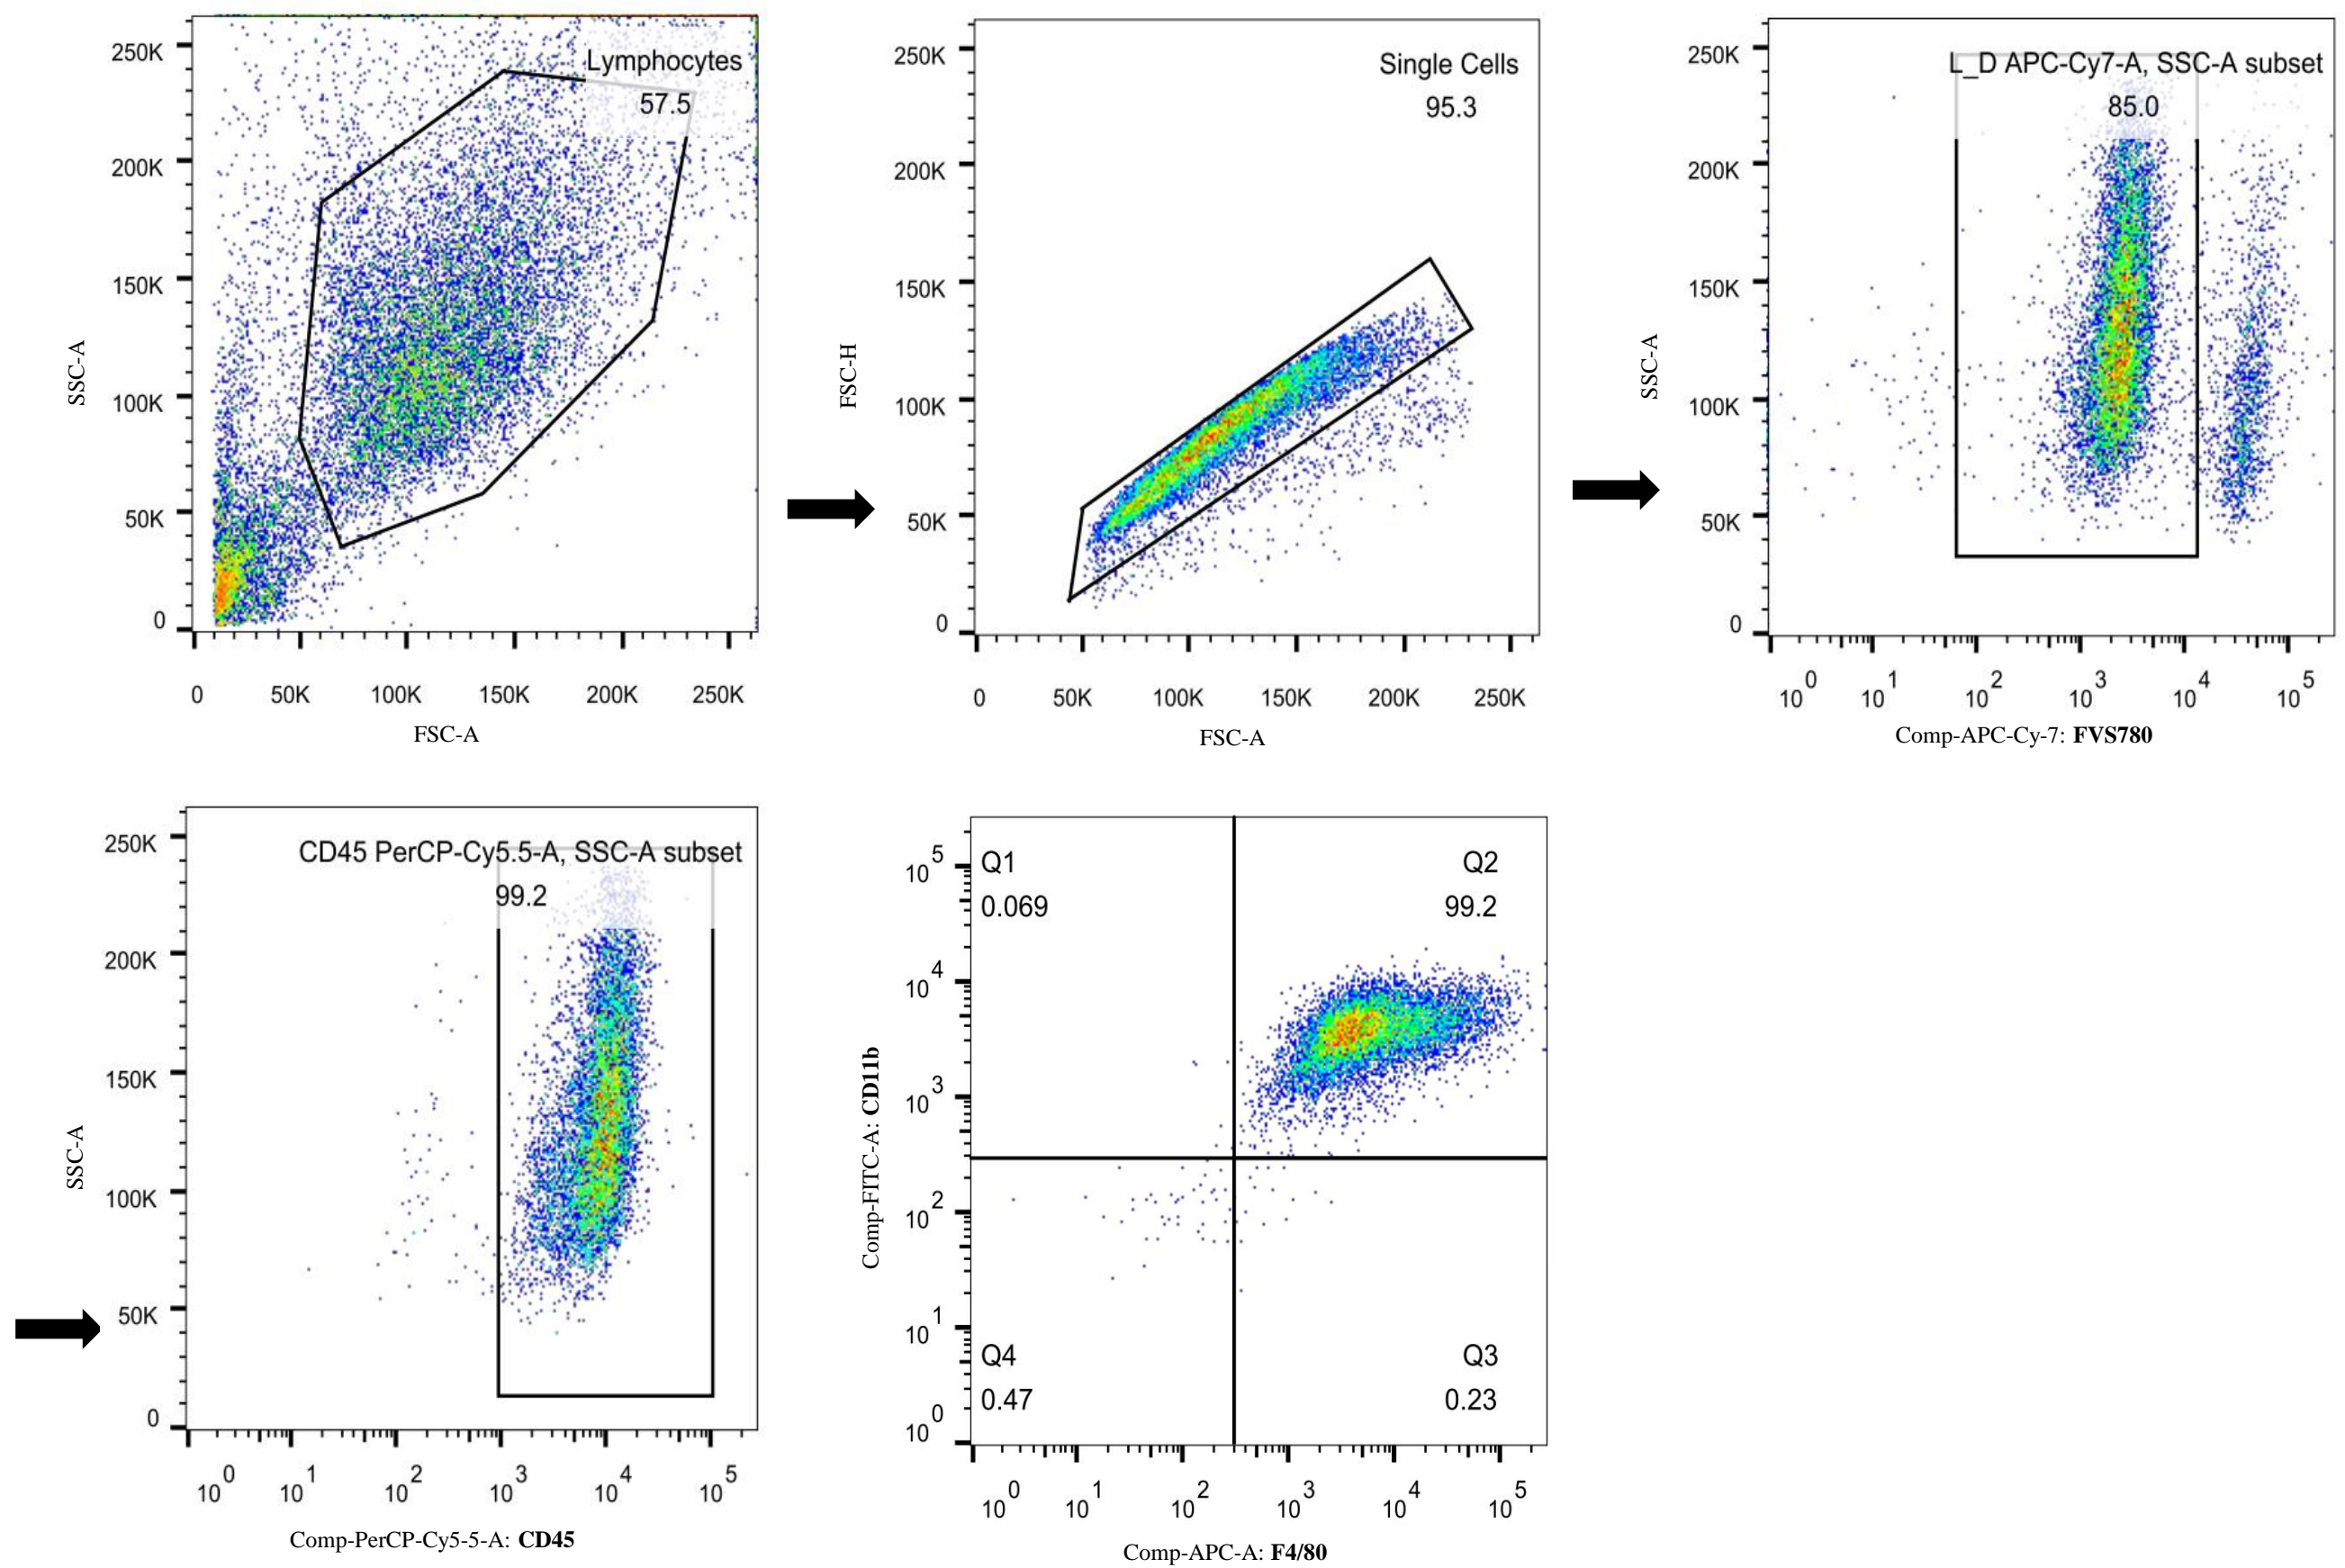

**Figure S2. Flow cytometry gating strategy for purity analysis of isolated BMDMs.**

## Supplementary Figure S3

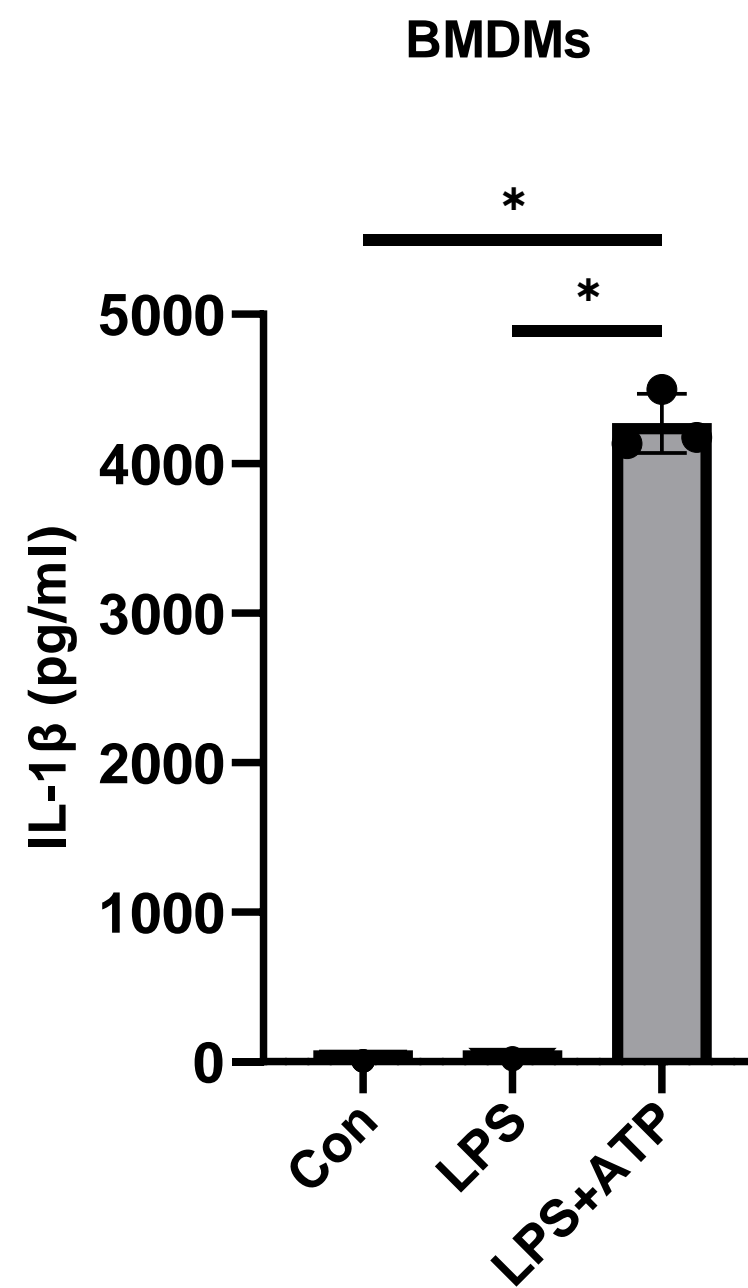

**Figure S3. Secretion of IL-1 $\beta$  in NLRP3 inflammasome within Bone Marrow-Derived Macrophages (BMDMs) (Control, LPS, and LPS+ATP group). \* $p < 0.05$  indicates statistical significance.**
